1        **Demethylmenaquinone methyl transferase is a membrane**  
2        **domain-associated protein essential for menaquinone**  
3        **homeostasis in *Mycobacterium smegmatis***

4  
5        Julia Puffal<sup>1</sup>, Jacob A. Mayfield<sup>2</sup>, D. Branch Moody<sup>2</sup>, and Yasu S. Morita<sup>1\*</sup>

6  
7        <sup>1</sup> Department of Microbiology, University of Massachusetts, Amherst, MA, USA

8        <sup>2</sup> Division of Rheumatology, Immunology and Allergy, Brigham and Women's Hospital,  
9        Harvard Medical School, Boston, MA, USA

10  
11        Running Title: Membrane compartmentalization of menaquinone biosynthesis

12        Keywords: Demethylmenaquinone methyl transferase, membrane domain, menaquinone,  
13        metabolic homeostasis, *Mycobacterium*

14  
15        Abstract Word Count: 259

16        Text Word Count: 5,585

17  
18        \* To whom correspondence should be addressed.

19        Department of Microbiology,

20        University of Massachusetts,

21        639 North Pleasant Street,

22        Amherst MA 01003, USA.

23        Tel: +1-413-545-4604, Fax: +1-413-545-1578

24        E-mail: [ymorita@microbio.umass.edu](mailto:ymorita@microbio.umass.edu)

25 **Abstract**

26

27

28

29

30

31

32

33

34

35

36

37

38

39

40

41

42

43

44

45

46

47

48

49

50

The intracellular membrane domain (IMD) in mycobacteria is a spatially distinct region of the plasma membrane with diverse functions. Previous comparative proteomic analysis of the IMD suggested that menaquinone biosynthetic enzymes are associated with this domain. In the present study, we determined the subcellular site of these enzymes using sucrose density gradient fractionation. We found that the last two enzymes, the methyltransferase MenG, and the reductase MenJ, are associated with the IMD. MenA, the prenyltransferase that mediates the first membrane-associated step of the menaquinone biosynthesis, is associated with the conventional plasma membrane. For MenG, we additionally showed the polar enrichment of the fluorescent protein fusion colocalizing with an IMD marker protein *in situ*. To start dissecting the roles of IMD-associated enzymes, we further tested the physiological significance of MenG. The deletion of *menG* at the endogenous genomic loci was possible only when an extra copy of the gene was present, indicating that it is an essential gene in *M. smegmatis*. Using a tetracycline-inducible switch, we achieved gradual and partial depletion of MenG over three consecutive 24 hour subcultures. This partial MenG depletion resulted in progressive slowing of growth, which corroborated the observation that *menG* is an essential gene. Upon MenG depletion, there was a significant accumulation of MenG substrate, demethylmenaquinone, even though the cellular level of menaquinone, the reaction product, was unaffected. Furthermore, the growth retardation was coincided with a lower oxygen consumption rate and ATP accumulation. These results imply a previously unappreciated role of MenG in regulating menaquinone homeostasis within the complex spatial organization of mycobacterial plasma membrane.

## 51 Introduction

52

53 *Mycobacterium smegmatis* has a complex membrane organization. In addition to  
54 the topologically distinct outer mycolyl and inner plasma membranes, the plasma  
55 membrane has a spatially distinct membrane domain known as the Intracellular  
56 Membrane Domain (IMD) (Hayashi et al., 2016; 2018). Experimentally, the IMD can be  
57 separated and purified from the conventional plasma membrane by sucrose density  
58 gradient fractionation of mycobacterial crude cell lysate (Morita et al., 2005). In this  
59 gradient fractionation, the IMD appears as vesicles of phospholipids without significant  
60 enrichment of cell wall components. In contrast, the conventional plasma membrane  
61 fraction contains both membrane phospholipids and cell wall components, suggesting  
62 that the conventional plasma membrane is tightly associated with the cell wall  
63 (designated as PM-CW). A more recent study revealed that the IMD is particularly  
64 enriched in the polar regions of the live actively growing cell, and associated with more  
65 than 300 proteins, among which are enzymes involved in cell envelope biosynthesis  
66 (Hayashi et al., 2016). Mycobacteria extend their cell envelope primarily from the polar  
67 region of the rod-shaped cell, and unlike other model bacteria such as *Escherichia coli* or  
68 *Bacillus subtilis*, the cylindrical part of the cell does not actively elongate (Aldridge et al.,  
69 2012; Thanky et al., 2007). Therefore, the polar IMD enrichment implies the strategic  
70 placement of membrane-bound enzymes that are involved in producing cell envelope  
71 biosynthetic precursors (Puffal et al., 2018). Nevertheless, there are many IMD-  
72 associated enzymes that are not involved in the cell envelope biosynthesis, suggesting  
73 more general functions of the IMD as a spatially distinct area of mycobacterial  
74 membrane, including the possible regulation of cytoplasmic metabolites, which is largely  
75 unexplored.

76 The biosynthetic enzymes for menaquinones (2-methyl-3-polyprenyl-1,4-  
77 naphthoquinones) are potential examples of such IMD-associated enzymes that are not  
78 directly involved in the cell envelope biosynthesis. Menaquinones are major lipoquinone  
79 electron carriers of mycobacterial respiratory chain. A major final product of the  
80 biosynthetic pathway is referred as MK-9 (II-H<sub>2</sub>), which carries a nonaprenyl chain with  
81 the second double bond ( $\beta$ -position) saturated (Collins et al., 1977). Its biosynthesis can  
82 be divided into the initial cytoplasmic reactions followed by the final membrane-  
83 associated steps (Meganathan, 2001). The membrane-associated reactions are mediated  
84 by three enzymes. First, the product of the cytoplasmic reactions, 1,4-dihydroxy-2-  
85 naphthoate, is attached to a polyprenol lipid by a membrane-bound polyprenyltransferase  
86 known as MenA (Dhiman et al., 2009) (Fig. 1A). Second, the resulting  
87 demethylmenaquinone is methylated on the aromatic ring by MenG (*syn.* MenH/UbiE),  
88 forming menaquinone (Dhiman et al., 2009). Finally, the double bond in the  $\beta$ -isoprene  
89 unit of the polyprenyl chain is reduced by the reductase MenJ to form the mature product,  
90 such as MK-9 (II-H<sub>2</sub>) (Upadhyay et al., 2015; 2018). Our comparative proteomic analysis  
91 of the IMD and the PM-CW suggested that MenG and MenJ are enriched in the IMD,  
92 while MenA was not detected in either the IMD or the PM-CW (Hayashi et al., 2016).

93 Menaquinone biosynthesis is a critical process in mycobacteria. A previous study  
94 revealed Ro 48-8071 as an inhibitor of MenA, and demonstrated that this and other  
95 MenA inhibitors arrest the growth of both *Mycobacterium tuberculosis* and *M.*  
96 *smegmatis*, and reduce the cellular oxygen consumption (Dhiman et al., 2009). Another

97 group showed that chemical inhibition of MenG is detrimental to the growth of *M.*  
98 *tuberculosis*, leading to the reduced oxygen consumption and ATP synthesis (Sukheja et  
99 al., 2017). In contrast, *menJ* is a dispensable gene in laboratory growth conditions: its  
100 deletion in *M. smegmatis* and *M. tuberculosis* produces viable mutants that show no  
101 significant changes in the growth rates (Upadhyay et al., 2015). Detailed analysis of this  
102 mutant revealed that the accumulation menaquinone-9 (MK-9) instead of MK-9 (II-H<sub>2</sub>)  
103 resulted in reduced electron transport efficiency. However, the mutant produced an  
104 increased amount of MK-9 to compensate partially for the loss of the mature species,  
105 indicating significant flexibility in meeting with the cellular needs of lipoquinones for  
106 respiration.

107 Combining evidence for the important roles of these enzymes with the new  
108 proteomic analysis suggesting that MenG and MenJ might be IMD-associated, we  
109 examined if the membrane steps of menaquinone biosynthesis is compartmentalized  
110 within the plasma membrane in *M. smegmatis*. In the present study, we directly  
111 demonstrated that MenG and MenJ are associated with the IMD while MenA is  
112 associated with the PM-CW. We further demonstrated that *menG* is an essential gene in  
113 *M. smegmatis*. Interestingly, partial depletion of MenG was detrimental to the *M.*  
114 *smegmatis* cells even though the cellular level of MK-9 and MK-9 (II-H<sub>2</sub>) remained high,  
115 implying a critical role of MenG in regulating menaquinone homeostasis in  
116 mycobacterial plasma membrane.

117

## 118 **Methods**

119

### 120 **Cell cultures**

121

122 *Mycobacterium smegmatis* mc<sup>2</sup>155 was grown as before (Hayashi et al., 2016) at  
123 30°C in Middlebrook 7H9 broth supplemented with 11 mM glucose, 14.5 mM NaCl, and  
124 0.05% Tween-80, or at 37°C on Middlebrook 7H10 agar supplemented with 11 mM  
125 glucose and 14.5 mM NaCl. When required, the medium was supplemented with 100  
126 µg/ml hygromycin B (Wako), 50 µg/ml streptomycin sulfate (Fisher Scientific), 20 µg/ml  
127 kanamycin sulfate (MP Biochemicals), or 5% sucrose.

128

### 129 **Construction of plasmids**

130

131 Plasmids used in this study are summarized in Table S1.

132 pMUM040 – To create expression vector for MenA which is C-terminally tagged  
133 with a hemagglutinin (HA) epitope, the gene was amplified by PCR (Table S2) using  
134 primers carrying appropriate restriction enzyme sites. The product was digested with  
135 BspEI and ligated to the vector backbone of pMUM038, which was linearized by  
136 BspEI/SspI double-digestion. The pMUM038 vector is identical to pMUM011 (Hayashi  
137 et al., 2016), a derivative of pVV16, but its sole NdeI site was removed by linearizing the  
138 plasmid using NdeI, blunting using the T4 polymerase, and circularizing using a DNA  
139 ligase.

140 pMUM042 – To create expression vector for MenG, which is C-terminally tagged  
141 with an HA epitope, the PCR product (Table S2) was inserted by blunt-end ligation to the  
142 vector backbone of pMUM012 (Hayashi et al., 2016), linearized by EcoRV and ScaI.



143 This intermediate plasmid, pMUM039, was then double-digested with NdeI and ScaI,  
144 and the fragment carrying *menG* gene was ligated into the linearized vector backbone of  
145 pMUM040 digested with the same enzymes.

146 pMUM055 – To knockout the endogenous *menG* gene, we amplified upstream  
147 and downstream regions of *menG* using the primers shown in Table S2 and digested with  
148 Van91I and DraIII, respectively. The two fragments were then ligated into Van91I-  
149 digested pCOM1 as previously described (Hayashi et al., 2016). The resulting plasmid,  
150 pMUM055, was used for allelic exchange of *menG* in *M. smegmatis* via a two-step  
151 recombination process as previously described (Hayashi et al., 2016; Rahlwes et al.,  
152 2017). The deletion of the *menG* gene was confirmed by PCR using primers A312 and  
153 A313 (Table S2).

154 pMUM098 – To create a MenG-HA expression vector with a kanamycin  
155 resistance selection marker, *menG-HA* gene fragment was isolated from pMUM042 (see  
156 above) by XmnI/EcoRI double digestion, and was inserted to XmnI/EcoRI double-  
157 digested pMUM087. pMUM087 is an NdeI-free version of pMV361 (Stover et al., 1991)  
158 (gift from Dr. William R. Jacobs Jr., Albert Einstein College of Medicine), created by  
159 digesting pMV361 with NdeI, and blunt-ending and re-ligating the linearized fragment.

160 pMUM103 – To create an expression vector for MenJ-HA, the gene was  
161 amplified by PCR (Table S2), and the PCR product was inserted directionally to  
162 pMUM098, from which the preexisting insert was removed by NdeI/ScaI double  
163 digestion.

164 pMUM058 – To create an expression vector for MenG tagged with mTurquoise,  
165 the mTurquoise gene was amplified by PCR (Table S2) from pYAB281 containing  
166 mTurquoise (Hayashi et al., 2016). The PCR product was then digested with ScaI and  
167 inserted to pMUM042, which was linearized by the same enzyme, creating an expression  
168 vector for C-terminally mTurquoise-HA epitope-tagged fusion protein.

169 pMUM119 – To create a dual-control tet-off expression vector for MenG, in  
170 which the protein is fused with HA epitope and DAS degradation tag at the C-terminus,  
171 we first created an intermediate construct pMUM106 by Gibson assembly of ClaI/NdeI  
172 double-digested pDE43-MCS (Blumenthal et al., 2010), the PCR amplified promoter  
173 region of pEN12A-P766-8G (A442/A443, Table S2) (Kim et al., 2013) (gift from Dr.  
174 Christopher Sassetti, University of Massachusetts Medical School), and the PCR-  
175 amplified *menG* gene from pMUM090 (A444/A445, Table S2), resulting in a MenG  
176 expression vector driven by the weak P766-8G promoter. We then inserted a fragment for  
177 the expression of TetR38, which was PCR-amplified from pEN41A-T38S38  
178 (A487/A488, Table S2) (Kim et al., 2013) and digested with EcoRV and BspTI, into  
179 pMUM106 digested with EcoRV and BspTI, resulting in pMUM110. To attach the HA  
180 and DAS tags, the *menG-HA* fragment was amplified by PCR (A185/A506, Table S2)  
181 from pMUM098. The PCR fragment and pMUM110 were digested with SacI and VspI  
182 and ligated, creating pMUM119. The SspB expression vector (pGMCT-3q-taq25) and  
183 non-replicative integrase expression vector (pGA-OX15-int-tw) (gift from Dr.  
184 Christopher Sassetti, University of Massachusetts Medical School) were co-  
185 electroporated to allow stable integration of pGMCT-3q-taq25.

186 Plasmid constructs (Table S1) were electroporated into *M. smegmatis* for  
187 integration and homologous recombination as previously described (Hayashi et al.,  
188 2016).

189

## 190 **Density gradient fractionation and protein analysis**

191

192 Log phase cells ( $OD_{600} = 0.5-1.0$ ) were pelleted, lysed by nitrogen cavitation, and  
193 subjected to sucrose density fractionation as previously described (Hayashi et al., 2016).  
194 Briefly, 1.2 ml of the lysate was loaded on top of a 20-50 % sucrose gradient prepared in  
195 a 14 x 95 mm tube (Seton Scientific). The gradient was spun at 35,000 rpm (218,000 x g)  
196 for 6 h at 4°C in a SW-40 rotor (Beckman-Coulter). Thirteen 1-ml fractions were then  
197 collected and used for further biochemical analysis. Protein concentration was  
198 determined by the bicinchoninic acid (BCA) assay (Pierce). Sucrose density was  
199 determined by a refractometer (ATAGO). For SDS-PAGE and western blotting, an equal  
200 volume of each fraction was loaded as described before (Hayashi et al., 2016; 2018).

201

## 202 **Fluorescence microscopy**

203

204 Fluorescence microscopic live imaging was done as previously described  
205 (Hayashi et al., 2016).

206

## 207 **Plasmid swap**

208

209 Expression vectors, pMUM098 (*menG-HA*, Kan<sup>r</sup>) and pMUM087 (empty vector,  
210 Kan<sup>r</sup>), were electroporated into *M. smegmatis*  $\Delta menG L5::menG-HA$  Str<sup>r</sup> strain to swap  
211 the inserted plasmid at the L5 integration site. The swapping was verified by culturing the  
212 transformed colonies on Middlebrook 7H10 plates containing kanamycin or  
213 streptomycin.

214

## 215 ***menG* conditional knockdown**

216

217 *M. smegmatis*  $\Delta menG L5::menG-HA$  Kan<sup>r</sup> was transformed with the plasmid  
218 pMUM119 (*tet<sub>off</sub> menG-HA-DAS* Str<sup>r</sup>) to swap at the L5 integration site to create  $\Delta menG$   
219  $L5::tet_{off} menG-HA-DAS$  Str<sup>r</sup>. This new strain was then transformed with pGMCT-3q-  
220 taq25/pGA-OX15-int-tw (*tet<sub>on</sub> sspB* Kan<sup>r</sup>), an integrative plasmid that recombines at an  
221 *attB* site for the mycobacteriophage Tweety (Pham et al., 2007), resulting in the *menG*  
222 dual-switch knockdown strain,  $\Delta menG L5::tet_{off} menG-HA-DAS$  Str<sup>r</sup> *Tweety::tet<sub>on</sub> sspB*  
223 Kan<sup>r</sup>.

224

225 A starter culture of the dual-switch *menG* knockdown strain, grown in  
226 Middlebrook 7H9 medium containing streptomycin and kanamycin, was inoculated into  
227 fresh Middlebrook 7H9 medium with or without 100 ng/ml anhydrotetracycline (ATC)  
228 and subsequently sub-cultured by 100-fold dilution every 24 h. One ml of each culture  
229 was taken for  $OD_{600}$  reading to monitor the growth, and colony formation unit (cfu) was  
230 determined at the 72-h timepoint. As controls, we used *M. smegmatis* strains carrying  
231 *Tweety::tet<sub>on</sub> sspB* Kan<sup>r</sup> alone. For menaquinone-4 (MK-4) supplementation, we prepared  
232 80 mM MK-4 stock solution in dimethyl sulfoxide and slowly added to a culture to  
233 achieve a final concentration of 400  $\mu$ M, following a previously published protocol  
234 (Dhiman et al., 2009). To analyze the protein depletion kinetics, western blot images  
were recorded and quantified using ImageQuant LAS4000mini (GE Healthcare).

235

## 236 **Mass spectrometric analysis of lipids**

237

238 A previously reported comparative lipidomics dataset (reproduced in Fig. S2A)  
239 (Hayashi et al., 2016) was further analyzed for annotations of several menaquinone  
240 species based on mass, which were subjected to validation by collision-induced  
241 dissociation mass spectrometry. For targeted analysis of menaquinone, we grew the cells  
242 in the presence and absence of ATC for 72 h, sub-culturing at every 24 h and harvested  
243 cells at 72 h. Cells were lysed by nitrogen cavitation and the lipids were extracted from  
244 the whole cell lysate. For lipid extraction, 500  $\mu$ l of cell lysates were supplemented with  
245 10 nmol of MK-4 (Millipore-Sigma) as an internal standard. Six ml ice-cold 0.2 M  
246 perchloric acid in methanol was added along with 6 ml petroleum ether (preheated to 40-  
247 60°C) as described previously (Bekker et al., 2007). The mixture was vortexed and spun,  
248 and the top organic layer was transferred to a new tube. The lower layer was extracted  
249 again with 6 ml of petroleum ether and the organic extracts were combined. The  
250 combined organic extract was washed once with 6 ml of water, and the final top organic  
251 layer was transferred to a new tube, dried and resuspended in 100  $\mu$ l  
252 chloroform/methanol (1:1). To evaluate the extraction efficiency, we subjected 10  $\mu$ l to  
253 thin layer chromatography and orcinol/H<sub>2</sub>SO<sub>4</sub> staining for the detection of  
254 phosphatidylinositol mannosides (Morita et al., 2004). AcPIM2 bands were quantified  
255 using Fiji (Schindelin et al., 2012), and used to adjust the lipid concentration of each  
256 sample.

257 The purified lipids were subjected to high-performance liquid chromatography  
258 (HPLC)-tandem mass spectrometry (Orbitrap Fusion with higher energy collisional  
259 dissociation (HCD) coupled with UltiMate 3000 HPLC system, Thermo Scientific), using  
260 PC-HILIC column (Shiseido) with acetonitrile/water (95:5) with 10 mM ammonium  
261 acetate (pH 8.0) as the mobile phase. The ESI was operated in a positive polarity mode,  
262 with spray voltage of 2.8 kV and flow rate of 0.3 ml/min. The full scan range was 100 to  
263 1,200  $m/z$  and the data was recorded using Xcalibur 3.0.63 software package (Thermo  
264 Scientific). For HCD, a quadrupole isolation mode was used with collision energy of  
265 40 $\pm$ 5% and data detected by Orbitrap (Thermo Scientific). The targeted  $m/z$  were defined  
266 as 771.6075 for demethylmenaquinone-9 (DMK-9), 785.6231 for MK-9, 787.6388 for  
267 MK-9 (II-H<sub>2</sub>), and 445.3101 for MK-4. The detection efficiency of MK-9 relative to MK-  
268 4 was determined using 20 pmol of commercially available MK-9 (Santa Cruz  
269 biotechnology) and MK-4 (Millipore-Sigma).

## 270 **Oxygen consumption**

271

272 The effect of MenG depletion on oxygen consumption was evaluated by  
273 methylene blue decolorization. One OD unit of each culture from the 72-h time-point was  
274 harvested, resuspended in 2 ml of Middlebrook 7H9, and supplemented with 0.001%  
275 methylene blue (Ricca). In sealed cuvettes, oxygen consumption was monitored by  
276 absorbance at 665 nm.

277

## 278 **Measurement of cellular ATP levels**

279

280 The dual-switch *menG* knockdown strain was incubated in the presence and  
281 absence of ATC for 72 h, sub-culturing at every 24 h, as described above. Intracellular  
282 ATP was determined by BacTiter Glo microbial cell viability assay (Promega), following  
283 manufacturer's instruction.

284

## 285 Results

286

### 287 The maturation of MK-9 takes place in the IMD

288

289 The three final steps on MK-9 biosynthesis are catalyzed by the enzymes MenA,  
290 MenG and MenJ (Fig. 1A). MenA is a protein with multiple predicted membrane  
291 spanning domains (Fig. 1B). MenG and MenJ have no predicted transmembrane  
292 domains, so the patterns and specific mechanisms of membrane association of these  
293 proteins might vary. Previously, we showed by comparative proteomics that peptide  
294 fragments corresponding to known MenG and MenJ sequences were recovered at higher  
295 level in the IMD than in the conventional plasma membrane (PM-CW) (Hayashi et al.,  
296 2016). Thus, MenG and MenJ are potentially IMD-associated proteins peripherally bound  
297 to the membrane surface. However, our proteomic analysis did not examine the  
298 cytoplasmic fraction, and therefore cannot exclude the possibility that these proteins  
299 reside also in the cytoplasm.

300 To determine the subcellular localization of these three enzymes based on direct  
301 detection of intact proteins in all three compartments, we expressed MenA-HA (expected  
302 molecular weight, 29 kDa), MenG-HA (25 kDa) and MenJ-HA (44 kDa) individually at  
303 the site-specific integration site of mycobacteriophage L5 in *M. smegmatis*, and  
304 confirmed that all three proteins were expressed at the expected molecular weight (Fig.  
305 S1). We then performed sucrose density gradient fractionation of each strain, and  
306 determined the subcellular localization of these enzymes within the gradient. PimB' and  
307 MptA are the protein markers for the IMD and PM-CW, respectively, and MenA-HA was  
308 enriched in the fractions corresponding to the PM-CW together with MptA (Fig. 2A). In  
309 contrast, MenG and MenJ were enriched in the IMD (Fig. 2B-C). The low density  
310 fractions (Fr. 1-2), that are high in total protein content, are known to be enriched in  
311 cytoplasmic proteins (Hayashi et al., 2016; Morita et al., 2005). Neither MenG nor MenJ  
312 was found in the cytoplasmic fraction, indicating that these two proteins are stably  
313 associated with the IMD.

314 To determine the subcellular localization of MenG in live bacteria, we next  
315 introduced an MenG-mTurquoise-HA expression vector, and expressed the fluorescent  
316 fusion protein in a previously established *M. smegmatis* strain expressing HA-mCherry-  
317 GltT2 from the endogenous *gltT2* locus. GltT2 is a galactosyltransferase involved in the  
318 arabinogalactan precursor synthesis, and is an IMD-associated protein (Hayashi et al.,  
319 2016). We first confirmed by sucrose density gradient that MenG-mTurquoise-HA co-  
320 fractionates with HA-mCherry-GltT2 and PimB' (Fig. 3A), but not with the PM-CW  
321 marker, MptA. The expected molecular weight of HA-mCherry-GltT2 and MenG-  
322 mTurquoise-HA are 100 and 50 kDa, respectively, allowing separate detection of these  
323 two HA-tagged proteins in a single western blot. This result also revealed the relatively  
324 lower expression level of MenG-mTurquoise-HA in comparison to HA-mCherry-GltT2,  
325 even though the expression of MenG is driven by a strong promoter. Consistent with the

326 apparently lower MenG expression in cellular extracts, we also observed a much weaker  
327 level of fluorescence from mTurquoise by fluorescence microscopy live imaging (Fig.  
328 3B). Although the weak fluorescence and a higher background due to autofluorescence  
329 (Patiño et al., 2008)(Fig. 3C) made the image analysis difficult, we were able to observe  
330 the polar enrichment of MenG-mTurquoise-HA, which correlated with the polar  
331 enrichment of HA-mCherry-GltT2 (Fig. 3B).

332 To determine if any menaquinone species are enriched in the IMD, we analyzed a  
333 comparative HPLC time-of-flight (TOF) mass spectrometry-derived lipidomic dataset  
334 comprised of 11,079 separately detected molecular events (Hayashi et al., 2016). This  
335 method was previously validated to extract hydrophobic molecules, including  
336 menaquinones, and normal phase chromatography reduces cross-suppression by more  
337 polar species, allowing semiquantitative detection of lipid compounds (Lahiri et al., 2016;  
338 Layre et al., 2011). The IMD preparations were previously validated based on IMD-  
339 specific proteins and revealed IMD-associated phospholipids among compounds  
340 upregulated in the IMD. The majority of these compounds were unnamed, but are  
341 discoverable based on matching their  $m/z$  values with the MycoMap dataset (Layre et al.,  
342 2011). This approach allowed the identification of signals matching the  $m/z$  value of  
343 DMK-9 and MK-9 in their reduced and non-reduced forms. While DMK-9 was equally  
344 present in both sites, the MK-9 species were overexpressed in IMD to varying degrees  
345 (Fig. S2A-B). The identity of both MK-9 (II-H<sub>2</sub>) and MK-9 were confirmed by collision-  
346 induced dissociation mass spectrometry (Fig. S2C), showing that they are in the ketone  
347 form with a reduced double bond in the nonaprenyl lipid moiety of MK-9 (II-H<sub>2</sub>). Taken  
348 together, these data suggest that 1) MenA produces DMK-9 in the PM-CW; 2) DMK-9  
349 relocates from the PM-CW to the IMD; 3) MenG methylates DMK-9 to generate MK-9  
350 in the IMD; and 4) MenJ reduces the prenyl lipid of MK-9 to form the mature molecule,  
351 MK-9 (II-H<sub>2</sub>), in the IMD (Fig. 4). For MK-9 (II-H<sub>2</sub>) to function as an electron carrier, it  
352 may then have to relocate back to the PM-CW because the respiratory chain enzymes are  
353 found in the PM-CW (Hayashi et al., 2016).

354

### 355 **The *menG* gene is essential in *M. smegmatis***

356

357 The intricate spatial segregation of biosynthetic enzymes suggests that  
358 menaquinone biosynthesis may be a highly regulated process. The association of this  
359 pathway also implies an indirect role of the IMD in the central energy metabolism.  
360 Nevertheless, little is known why the MenG- and MenJ-dependent modifications on  
361 DMK-9 are physiologically important. MenJ is dispensable for growth of both *M.*  
362 *tuberculosis* and *M. smegmatis* in standard laboratory growth conditions (Upadhyay et  
363 al., 2015). In contrast, *menG* is predicted to be essential in *M. tuberculosis* (Griffin et al.,  
364 2011), but no direct or indirect information about its essentiality is available for *M.*  
365 *smegmatis*.

366 To begin delineating the function of MenG, we first attempted to knock out *menG*  
367 by a markerless deletion using a plasmid that carries *sacB* gene as a negative selection  
368 marker and hygromycin resistance gene as a positive selection marker (Hayashi et al.,  
369 2016) (Fig. S3A). We confirmed the establishment of a single-crossover mutant that is  
370 sensitive to sucrose (due to *sacB* gene) and resistant to hygromycin. We then grew the  
371 single-crossover mutant in nonselective medium to allow the second crossover event, and



372 isolated 17 colonies that are resistant to sucrose and sensitive to hygromycin. When we  
373 analyzed these double-crossover candidates, they were all found to be wild-type  
374 revertants and no candidate had the *menG* deletion (data not shown). These initial  
375 observations suggested that *menG* is an essential gene.

376 To test this further, we created a merodiploid strain of the single-crossover  
377 mutant, in which a *menG* expression vector with a streptomycin resistance marker  
378 (pMUM042) was inserted at the L5 integration site (Fig. S3A). We successfully isolated  
379 double-crossover mutants from the merodiploid single-crossover strain, as confirmed by  
380 PCR of the endogenous *menG* gene locus (Fig. S3B). Using the double-crossover mutant,  
381 we attempted to swap the *menG* expression vector, pMUM042, carrying streptomycin  
382 resistance marker with another L5-integrative *menG* expression vector, pMUM098,  
383 carrying kanamycin resistance marker or with an empty vector, pMUM087, carrying  
384 kanamycin resistance marker as a control. When pMUM098 was used, 240 colonies were  
385 obtained (Fig. S4). We patched 78 colonies on Middlebrook 7H10 medium containing  
386 either streptomycin or kanamycin, and found that all 78 colonies were sensitive to  
387 streptomycin and resistant to kanamycin, suggesting that pMUM042 was swapped with  
388 pMUM098. In contrast, when the empty vector pMUM087 was used, only 3 colonies  
389 were obtained and they were all resistant to both kanamycin and streptomycin, suggesting  
390 that the cells could not lose pMUM042 carrying *menG* gene. Using a newly established  
391 kanamycin-resistant strain carrying pMUM098, we attempted to swap back using  
392 streptomycin-resistant pMUM042. Again, we were able to isolate 20 colonies using  
393 pMUM042, but no legitimate swapping occurred using the empty vector, pMUM038  
394 (Fig. S4). Taken together, these data strongly support that *menG* is an essential gene.  
395

### 396 **MenG depletion leads to growth arrest without significant depletion of** 397 **menaquinone**

398  
399 To examine the mechanistic basis of MenG essentiality in *M. smegmatis*, we  
400 constructed a cell line with a dual-control switch in which ATC suppresses the expression  
401 of *menG* and degrades MenG protein simultaneously (Fig. 5A) (Kim et al., 2013). In this  
402  $\Delta menG$  L5::*tet*<sup>Off</sup> *menG*-HA-DAS Str<sup>r</sup> *Tweety*::*tet*<sup>On</sup> *spsB* Kan<sup>r</sup> strain, an inducer ATC  
403 turns off the transcription of *menG*-HA-DAS gene. At the same time, the transcription of  
404 *spsB* gene is turned on, and the SpsB adaptor protein recognizes and targets the DAS-  
405 tagged protein for ClpXP-dependent degradation. Upon addition of ATC, the cells started  
406 to show deficiency in growth after two consecutive series of 24-h sub-culturing. The  
407 OD<sub>600</sub> reading for the treated cells became significantly lower after 3 rounds of sub-  
408 culturing (Fig. 5B). The cfu for untreated and ATC-treated cultures were  $1.8 \times 10^7$  and  
409  $5.2 \times 10^6$  cfu/ml, respectively, comparable to the OD measurements, suggesting MenG  
410 depletion is bacteriostatic rather than bactericidal. We examined the protein level of  
411 MenG over the time course, and found that total protein fell to ~76% of the level found in  
412 untreated cells by 48 h (Fig. 5C). This moderate suppression of MenG continued even at  
413 the 72 h time point, where the MenG protein was reduced further to the ~35% of the level  
414 found in untreated cells (Fig. 5C). The relatively mild MenG depletion made us wonder if  
415 the lack of growth is due to the depletion of menaquinone. In *M. tuberculosis*, the growth  
416 arrest by the MenG inhibitor was rescued by the addition of MK-4 as a surrogate  
417 menaquinone (Sukheja et al., 2017). Therefore, we added MK-4 to see if exogenously

418 added menaquinone can rescue the growth of the mutant in the presence of ATC. As  
419 shown in Fig. S5, MK-4 supplementation was unable to rescue the growth of the ATC-  
420 treated cells, suggesting that the growth defect of the mutant might not be due to the  
421 depletion of menaquinone.

422 To evaluate the impact of MenG depletion on cellular menaquinone levels, we  
423 took the 72-h time point, and performed HPLC tandem mass spectrometry analysis on the  
424 lipid extracts from crude lysates. We confirmed the identity of MK-9 ( $m/z$  785.6231),  
425 MK-9 (II-H<sub>2</sub>) (787.6388), and DMK-9 (771.6075) by fragmentation (Fig. S6), and  
426 quantified the levels of each species relative to the internal standard MK-4 ( $m/z$   
427 445.3101).

428 As expected, we saw a significant increase in the DMK-9 levels when cells were  
429 treated with ATC (Fig. 6A). Surprisingly, the levels of MK-9 and MK-9 (II-H<sub>2</sub>) were not  
430 significantly different between the untreated and MenG-depleted strains (Fig. 6B-C).  
431 These data support the idea that the partial depletion of MenG leads to the accumulation  
432 of the MenG substrate, DMK-9, immediately impacting cellular metabolic activities prior  
433 to affecting the cellular levels of MK-9 and MK-9 (II-H<sub>2</sub>).

434  
435  
436

### 437 **Impact of MenG depletion on respiration and cellular ATP levels**

438

439 Because MenG depletion appears to have no immediate effect on the levels of  
440 MK-9 and MK-9 (II-H<sub>2</sub>), we examined if cellular respiration is affected upon MenG  
441 depletion. Cells were grown as previously for 72 h with sub-culturing at every 24 h, and  
442 aliquots of cell suspension was tested for O<sub>2</sub> consumption using the decolorization of  
443 methylene blue. We found that the untreated (ATC-) cells rapidly depleted the O<sub>2</sub> from  
444 the media, but the treated (ATC+) cells consumed very little O<sub>2</sub> during the same period  
445 (Fig. 7A), suggesting that respiration in the ATC+ cells is significantly reduced even  
446 though these cells are viable as indicated above by the cfu.

447 The severe reduction in the rate of aerobic respiration suggested an impact on the  
448 central metabolism. We next examined the cellular level of ATP when the cells were  
449 treated with ATC during the third sub-culturing from the 48-h time point to the 72-h time  
450 point. We found that the MenG-depleted (ATC+) cells accumulated ~3 times more ATP  
451 that the untreated (ATC-) cells (Fig. 7B). This was not due to the SspB expression  
452 because a control cell line, which only expresses SspB upon ATC addition, did not show  
453 any changes in cellular ATP levels (Fig. S7). These data are consistent with the idea that  
454 MenG depletion resulted in the reduction of the cellular metabolism, and the lack of  
455 energy consumption resulted in the accumulation of ATP.

456

### 457 **Discussion**

458

459 The IMD is a metabolically active membrane domain that mediates many distinct  
460 biosynthetic pathways. In this study, we demonstrated that the final maturation steps of  
461 the menaquinone biosynthesis take place in the IMD, and MenG, one of the IMD-  
462 associated enzymes, is essential for the growth of *M. smegmatis*. The IMD association of  
463 MenG is supported by three lines of evidence gathered *in vitro* and in live cells. First,



464 proteomic analysis indicated that MenG is more enriched in the IMD than in the PM-CW  
465 (Hayashi et al. 2016). Second, epitope-tagged MenG was biochemically localized to the  
466 IMD by density gradient fractionation. Although we cannot completely rule out the  
467 possibility that the HA epitope tag interferes with the subcellular localization, the IMD  
468 localization of the fusion protein was consistent with the proteomic identification of the  
469 endogenous protein in the IMD as mentioned above. Finally, fluorescent protein-tagged  
470 MenG showed colocalization with a known IMD marker at polar regions of actively  
471 growing cells by fluorescence microscopy. Combined with the IMD localization of  
472 epitope-tagged MenJ, we suggest that menaquinone species, MK-9 and MK-9 (II-H<sub>2</sub>), are  
473 produced in the IMD. Indeed, the comparative lipidomic analysis suggested that MK-9  
474 (II-H<sub>2</sub>) as well as MK-9 are relatively enriched in the IMD, but overall do not show the  
475 high levels of segregation as seen for the proteins that act on them. These observations  
476 suggest cellular regulation of the enzymes with substrates diffusing between both sites.

477 Do menaquinones have a functional role in the IMD or is it merely produced  
478 there? We propose that menaquinones function as an electron carrier for some IMD-  
479 associated enzymes. For example, we have previously shown that the dihydroorotate  
480 dehydrogenase PyrD, an enzyme involved in pyrimidine biosynthesis, is an IMD-  
481 associated protein (Hayashi et al., 2016). Mycobacterial PyrD is a member of the class 2  
482 dihydroorotate dehydrogenases (Björnberg et al., 1997; Munier-Lehmann et al., 2013),  
483 which utilize quinones instead of NADH as an electron acceptor. Therefore, *de novo*  
484 synthesized menaquinones are locally available to support the IMD-resident PyrD  
485 reaction.

486 Nevertheless, a major fraction of menaquinones must also be available for  
487 cytochromes in the respiratory chain. Our comparative proteomic analysis suggested that  
488 the respiratory chain cytochromes as well as H<sup>+</sup>-ATPases are enriched in the  
489 conventional plasma membrane (Hayashi et al., 2016). For example, the subunits of  
490 cytochrome *c* reductase (QcrCAB; MSMEG\_4261-4263) and aa<sub>3</sub> cytochrome *c* oxidase  
491 (CtaC; MSMEG\_4268), as well as the subunits of H<sup>+</sup>-ATPases (*e.g.* alfa, beta, H, F and  
492 A; MSMEG\_4938, MSMEG\_4936, MSMEG\_4939, MSMEG\_4940, MSMEG\_4942,  
493 respectively) are enriched in the PM-CW proteome. Furthermore, the major NADH  
494 oxidase reactions take place in the PM-CW (Morita et al., 2005). Together,  
495 menaquinones produced in the IMD may be relocated to the PM-CW to support cellular  
496 respiration. Whether menaquinones diffuse through different membrane areas or require a  
497 transport mechanism remains an important question to be addressed in the future.

498 Several independent lines of experimental evidence clearly indicated that MenG is  
499 an essential protein in *M. smegmatis*. In the dual-switch knockdown system, the depletion  
500 of MenG protein was only partial even after three consecutive 24-h subcultures. We do  
501 not know why this mutant shows this unusual protein depletion kinetics, but speculate  
502 that the protein degradation is not efficient and MenG might have a prolonged half-life.  
503 Nevertheless, this mild MenG depletion led to the growth arrest. Why is this mild MenG  
504 depletion detrimental to *M. smegmatis*? Indeed, MK-9 is still abundantly present after  
505 three 24-h subcultures with ATC induction. The MenG substrate, DMK-9, however,  
506 showed a significantly increase in the treated population. We speculate that MenG might  
507 play a key regulatory role in the IMD, and the disruption of the balance between MK-9  
508 and DMK-9 by its partial depletion could induce metabolic shutdown and the cessation of  
509 growth.

510 In *M. tuberculosis*, a recent study demonstrated that MenG is an effective drug  
511 target, and its inhibition led to the reduced oxygen consumption and ATP production.  
512 Our data in *M. smegmatis* is consistent with the previous findings in *M. tuberculosis* in  
513 that MenG is an essential protein, but also illuminate some important differences. First,  
514 we could not rescue the MenG depletion by the addition of MK-4, while exogenously  
515 supplemented MK-4 was apparently incorporated into the plasma membrane to function  
516 as a surrogate electron carrier in *M. tuberculosis* in the presence of MenG inhibitor  
517 (Sukheja et al., 2017). Second, MenG depletion in *M. smegmatis* did not lead to the  
518 reduction in ATP production. These differences could possibly be attributed to the  
519 differing chemical versus genetic methods of perturbation used in the two studies.  
520 Importantly, DMK, which accumulates upon MenG perturbation, is a fully functional  
521 electron carrier in *Escherichia coli* (Sharma et al., 2012; Uden and Bongaerts, 1997; van  
522 Beilen and Hellingwerf, 2016), implying that the physiological importance of the MenG-  
523 mediated methylation of the DMK aromatic ring in mycobacteria is not merely a matter  
524 of the mid-point electron potential of quinones as electron carriers.

525 Why does ATP accumulate during MenG depletion? In many other bacteria, when  
526 proton gradient formation is compromised, ATP synthase can be reversed to hydrolyze  
527 ATP and used to reestablish the proton gradient (Ballmoos et al., 2009). In mycobacteria,  
528 on the other hand, such reverse action of ATP synthetase is blocked and cannot be used  
529 to energize the membrane (Haagsma et al., 2010). Therefore, even when the cells are  
530 exposed to hypoxic conditions and cannot create a sufficient level of proton motive force,  
531 the accumulating ATP in the cell might not be utilized for energizing the membrane.

532 MenG expression is upregulated in response to the depletion of S-  
533 adenosylmethionine, indicating one example of transcriptional regulations of *menG* gene  
534 in response to changing metabolic state of the cell (Berney et al., 2015). We speculate  
535 that MenG depletion might be mimicking an adaptive response to an environmental  
536 change, leading the cells to stop aerobic respiration and consumption of ATP. In addition,  
537 we cannot rule out the possibility that the cells start using an alternative electron acceptor  
538 instead of oxygen. Such an adaptive response is known in *E. coli* (Edwards et al., 2006;  
539 Georgellis et al., 2001; Malpica et al., 2004), where changes in the environmental oxygen  
540 level result in a switch of lipoquinone species used in the electron transport chain. In this  
541 regard, when oxygen is depleted in mycobacteria, hydrogenases are suggested to drive  
542 the electron transport chain in the absence of exogenous electron acceptors (Berney and  
543 Cook, 2010), allowing continued production of ATP.

544 While menaquinones are the main lipoquinone for mycobacteria during aerobic  
545 growth, the biosynthesis of isoprenoid precursors is markedly downregulated during  
546 hypoxia, resulting in a depletion of menaquinones (Honaker et al., 2010; Matsoso et al.,  
547 2005). Under such hypoxic conditions, addition of the MK-9 analogue MK-4 (vitamin  
548 K2) or the saturated form (vitamin K1) is harmful and reduces the survival of *M.*  
549 *tuberculosis* (Honaker et al., 2010). A more recent study demonstrated that hypoxic  
550 conditions in a biofilm lead to the biosynthesis of polyketide quinones, which are  
551 alternative electron carriers that are produced by the type III polyketide synthases (Anand  
552 et al., 2015). These previous studies indicate that lipoquinone biosynthesis is a highly  
553 regulated process, controlled by sensing changing environmental factors. Our study  
554 showed that a partial depletion of MenG leads to the accumulation of DMK-9 without  
555 significant changes in the MK-9 pool. We speculate that this imbalance of DMK-9 and

556 MK-9, induced by the MenG depletion, has a global impact on metabolic activity. While  
557 further studies are needed to understand the complex changes in menaquinone  
558 metabolism during MenG depletion, our current study highlights the spatial complexity  
559 of menaquinone biosynthesis, and the essential role of MenG, an IMD-associated protein,  
560 in maintaining the metabolic homeostasis and the active growth of *M. smegmatis*.

561

## 562 **Acknowledgements**

563

564 This work was supported by grants from the Pittsfield Anti-Tuberculosis Association to  
565 YSM and the NIAID to DBM (AI 111224, AI 049313), and the University of  
566 Massachusetts Graduate School Dissertation Research Grant to JP. JP is a recipient of the  
567 Science Without Borders Fellowship from CAPES-Brazil (0328-13-8). We thank Dr.  
568 Stephen Eyles (the Mass Spectrometry Center, the Institute of Applied Life Sciences,  
569 University of Massachusetts Amherst) for help with mass spectrometry.

570

## 571 **References**

572

573 Aldridge, B. B., Fernandez-Suarez, M., Heller, D., Ambravaneswaran, V., Irimia, D.,  
574 Toner, M., et al. (2012). Asymmetry and aging of mycobacterial cells lead to variable  
575 growth and antibiotic susceptibility. *Science* 335, 100–104.  
576 doi:10.1126/science.1216166.

577 Anand, A., Verma, P., Singh, A. K., Kaushik, S., Pandey, R., Shi, C., et al. (2015).  
578 Polyketide quinones are alternate intermediate electron carriers during mycobacterial  
579 respiration in oxygen-deficient niches. *Mol. Cell* 60, 637–650.  
580 doi:10.1016/j.molcel.2015.10.016.

581 Ballmoos, von, C., Wiedenmann, A., and Dimroth, P. (2009). Essentials for ATP  
582 synthesis by F<sub>1</sub>F<sub>0</sub> ATP synthases. *Annu. Rev. Biochem.* 78, 649–672.  
583 doi:10.1146/annurev.biochem.78.081307.104803.

584 Bekker, M., Kramer, G., Hartog, A. F., Wagner, M. J., de Koster, C. G., Hellingwerf, K.  
585 J., et al. (2007). Changes in the redox state and composition of the quinone pool of  
586 *Escherichia coli* during aerobic batch-culture growth. *Microbiology* 153, 1974–1980.  
587 doi:10.1099/mic.0.2007/006098-0.

588 Berney, M., and Cook, G. M. (2010). Unique flexibility in energy metabolism allows  
589 mycobacteria to combat starvation and hypoxia. *PLoS One* 5, e8614.  
590 doi:10.1371/journal.pone.0008614.s007.

591 Berney, M., Berney-Meyer, L., Wong, K.-W., Chen, B., Chen, M., Kim, J., et al. (2015).  
592 Essential roles of methionine and S-adenosylmethionine in the autarkic lifestyle of  
593 *Mycobacterium tuberculosis*. *Proc. Natl. Acad. Sci. USA*, 201513033.  
594 doi:10.1073/pnas.1513033112.

595 Björnberg, O., Rowland, P., Larsen, S., and Jensen, K. F. (1997). Active site of  
596 dihydroorotate dehydrogenase A from *Lactococcus lactis* investigated by chemical  
597 modification and mutagenesis. *Biochemistry* 36, 16197–16205.  
598 doi:10.1021/bi971628y.

599 Blumenthal, A., Trujillo, C., Ehrhart, S., and Schnappinger, D. (2010). Simultaneous  
600 analysis of multiple *Mycobacterium tuberculosis* knockdown mutants *in vitro* and *in*  
601 *vivo*. *PLoS One* 5, e15667. doi:10.1371/journal.pone.0015667.

- 602 Collins, M. D., Pirouz, T., Goodfellow, M., and Minnikin, D. E. (1977). Distribution of  
603 menaquinones in actinomycetes and corynebacteria. *J. Gen. Microbiol.* 100, 221–230.  
604 doi:10.1099/00221287-100-2-221.
- 605 Dhiman, R. K., Mahapatra, S., Slayden, R. A., Boyne, M. E., Lenaerts, A., Hinshaw, J.  
606 C., et al. (2009). Menaquinone synthesis is critical for maintaining mycobacterial  
607 viability during exponential growth and recovery from non-replicating persistence.  
608 *Mol. Microbiol.* 72, 85–97. doi:10.1111/j.1365-2958.2009.06625.x.
- 609 Edwards, J. C., Johnson, M. S., and Taylor, B. L. (2006). Differentiation between  
610 electron transport sensing and proton motive force sensing by the Aer and Tsr  
611 receptors for aerotaxis. *Mol. Microbiol.* 62, 823–837. doi:10.1111/j.1365-  
612 2958.2006.05411.x.
- 613 Georgellis, D., Kwon, O., and Lin, E. C. (2001). Quinones as the redox signal for the Arc  
614 two-component system of bacteria. *Science* 292, 2314–2316.  
615 doi:10.1126/science.1059361.
- 616 Griffin, J. E., Gawronski, J. D., DeJesus, M. A., Ioerger, T. R., Akerley, B. J., and  
617 Sasseti, C. M. (2011). High-resolution phenotypic profiling defines genes essential  
618 for mycobacterial growth and cholesterol catabolism. *PLoS Pathog* 7, e1002251.  
619 doi:10.1371/journal.ppat.1002251.g004.
- 620 Haagsma, A. C., Driessen, N. N., Hahn, M.-M., Lill, H., and Bald, D. (2010). ATP  
621 synthase in slow- and fast-growing mycobacteria is active in ATP synthesis and  
622 blocked in ATP hydrolysis direction. *FEMS Microbiol. Lett.* 313, 68–74.  
623 doi:10.1111/j.1574-6968.2010.02123.x.
- 624 Hayashi, J. M., Luo, C.-Y., Mayfield, J. A., Hsu, T., Fukuda, T., Walfield, A. L., et al.  
625 (2016). Spatially distinct and metabolically active membrane domain in  
626 mycobacteria. *Proc. Natl. Acad. Sci. USA* 113, 5400–5405.  
627 doi:10.1073/pnas.1525165113.
- 628 Hayashi, J. M., Richardson, K., Melzer, E. S., Sandler, S. J., Aldridge, B. B., Siegrist, M.  
629 S., et al. (2018). Stress-induced reorganization of the mycobacterial membrane  
630 domain. *mBio* 9, e01823–17. doi:10.1128/mBio.01823-17.
- 631 Honaker, R. W., Dhiman, R. K., Narayanasamy, P., Crick, D. C., and Voskuil, M. I.  
632 (2010). DosS responds to a reduced electron transport system to induce the  
633 *Mycobacterium tuberculosis* DosR regulon. *J. Bacteriol.* 192, 6447–6455.  
634 doi:10.1128/JB.00978-10.
- 635 Kim, J.-H., O'Brien, K. M., Sharma, R., Boshoff, H. I. M., Rehren, G., Chakraborty, S., et  
636 al. (2013). A genetic strategy to identify targets for the development of drugs that  
637 prevent bacterial persistence. *Proc. Natl. Acad. Sci. USA* 110, 19095–19100.  
638 doi:10.1073/pnas.1315860110.
- 639 Krogh, A., Larsson, B., Heijne, von, G., and Sonnhammer, E. L. (2001). Predicting  
640 transmembrane protein topology with a hidden Markov model: application to  
641 complete genomes. *J. Mol. Biol.* 305, 567–580. doi:10.1006/jmbi.2000.4315.
- 642 Lahiri, N., Shah, R. R., Layre, E., Young, D., Ford, C., Murray, M. B., et al. (2016).  
643 Rifampin resistance mutations are associated with broad chemical remodeling of  
644 *Mycobacterium tuberculosis*. *J. Biol. Chem.* 291, 14248–14256.  
645 doi:10.1074/jbc.M116.716704.
- 646 Layre, E., Sweet, L., Hong, S., Madigan, C. A., Desjardins, D., Young, D. C., et al.  
647 (2011). A comparative lipidomics platform for chemotaxonomic analysis of



- 648 *Mycobacterium tuberculosis*. *Chem. Biol.* 18, 1537–1549.  
649 doi:10.1016/j.chembiol.2011.10.013.
- 650 Malpica, R., Franco, B., Rodriguez, C., Kwon, O., and Georgellis, D. (2004).  
651 Identification of a quinone-sensitive redox switch in the ArcB sensor kinase. *Proc.*  
652 *Natl. Acad. Sci. USA* 101, 13318–13323. doi:10.1073/pnas.0403064101.
- 653 Matsoso, L. G., Kana, B. D., Crellin, P. K., Lea-Smith, D. J., Pelosi, A., Powell, D., et al.  
654 (2005). Function of the cytochrome *bc<sub>1</sub>-aa<sub>3</sub>* branch of the respiratory network in  
655 mycobacteria and network adaptation occurring in response to its disruption. *J.*  
656 *Bacteriol.* 187, 6300–6308. doi:10.1128/JB.187.18.6300-6308.2005.
- 657 Meganathan, R. (2001). Biosynthesis of menaquinone (vitamin K<sub>2</sub>) and ubiquinone  
658 (coenzyme Q): a perspective on enzymatic mechanisms. *Vitam. Horm.* 61, 173–218.
- 659 Morita, Y. S., Patterson, J. H., Billman-Jacobe, H., and McConville, M. J. (2004).  
660 Biosynthesis of mycobacterial phosphatidylinositol mannosides. *Biochem. J.* 378,  
661 589–597. doi:10.1042/BJ20031372.
- 662 Morita, Y. S., Velasquez, R., Taig, E., Waller, R. F., Patterson, J. H., Tull, D., et al.  
663 (2005). Compartmentalization of lipid biosynthesis in mycobacteria. *J. Biol. Chem.*  
664 280, 21645–21652. doi:10.1074/jbc.M414181200.
- 665 Munier-Lehmann, H., Vidalain, P.-O., Tangy, F., and Janin, Y. L. (2013). On  
666 dihydroorotate dehydrogenases and their inhibitors and uses. *J. Med. Chem.* 56,  
667 3148–3167. doi:10.1021/jm301848w.
- 668 Patiño, S., Alamo, L., Cimino, M., Casart, Y., Bartoli, F., García, M. J., et al. (2008).  
669 Autofluorescence of mycobacteria as a tool for detection of *Mycobacterium*  
670 *tuberculosis*. *J. Clin. Microbiol.* 46, 3296–3302. doi:10.1128/JCM.02183-08.
- 671 Pham, T. T., Jacobs-Sera, D., Pedulla, M. L., Hendrix, R. W., and Hatfull, G. F. (2007).  
672 Comparative genomic analysis of mycobacteriophage Tweety: evolutionary insights  
673 and construction of compatible site-specific integration vectors for mycobacteria.  
674 *Microbiology* 153, 2711–2723. doi:10.1099/mic.0.2007/008904-0.
- 675 Puffal, J., García-Heredia, A., Rahlwes, K. C., Siegrist, M. S., and Morita, Y. S. (2018).  
676 Spatial control of cell envelope biosynthesis in mycobacteria. *Pathog. Dis.* 76, fty027.  
677 doi:10.1093/femspd/fty027.
- 678 Schindelin, J., Arganda-Carreras, I., Frise, E., Kaynig, V., Longair, M., Pietzsch, T., et al.  
679 (2012). Fiji: an open-source platform for biological-image analysis. *Nat Meth* 9, 676–  
680 682. doi:10.1038/nmeth.2019.
- 681 Sharma, P., Teixeira de Mattos, M. J., Hellingwerf, K. J., and Bekker, M. (2012). On the  
682 function of the various quinone species in *Escherichia coli*. *FEBS J.* 279, 3364–3373.  
683 doi:10.1111/j.1742-4658.2012.08608.x.
- 684 Stover, C. K., la Cruz, de, V. F., Fuerst, T. R., Burlein, J. E., Benson, L. A., Bennett, L.  
685 T., et al. (1991). New use of BCG for recombinant vaccines. *Nature* 351, 456–460.  
686 doi:10.1038/351456a0.
- 687 Sukheja, P., Kumar, P., Mittal, N., Li, S.-G., Singleton, E., Russo, R., et al. (2017). A  
688 novel small-molecule inhibitor of the *Mycobacterium tuberculosis*  
689 demethylmenaquinone methyltransferase MenG is bactericidal to both growing and  
690 nutritionally deprived persister cells. *mBio* 8, e02022–16–15.  
691 doi:10.1128/mBio.02022-16.

- 692 Thanky, N. R., Young, D. B., and Robertson, B. D. (2007). Unusual features of the cell  
693 cycle in mycobacteria: polar-restricted growth and the snapping-model of cell  
694 division. *Tuberculosis* 87, 231–236. doi:10.1016/j.tube.2006.10.004.
- 695 Unden, G., and Bongaerts, J. (1997). Alternative respiratory pathways of *Escherichia*  
696 *coli*: energetics and transcriptional regulation in response to electron acceptors.  
697 *Biochim. Biophys. Acta* 1320, 217–234.
- 698 Upadhyay, A., Fontes, F. L., Gonzalez-Juarrero, M., McNeil, M. R., Crans, D. C.,  
699 Jackson, M., et al. (2015). Partial saturation of menaquinone in *Mycobacterium*  
700 *tuberculosis*: Function and essentiality of a novel reductase, MenJ. *ACS Cent. Sci.* 1,  
701 292–302. doi:10.1021/acscentsci.5b00212.
- 702 Upadhyay, A., Kumar, S., Rooker, S. A., Koehn, J. T., Crans, D. C., McNeil, M. R., et al.  
703 (2018). Mycobacterial MenJ, an oxidoreductase involved in menaquinone  
704 biosynthesis. *ACS Chem. Biol.*, acschembio.8b00402.  
705 doi:10.1021/acscchembio.8b00402.
- 706 van Beilen, J. W. A., and Hellingwerf, K. J. (2016). All three endogenous quinone  
707 species of *Escherichia coli* are involved in controlling the activity of the  
708 aerobic/anaerobic response regulator ArcA. *Front. Microbio.* 7, 1339.  
709 doi:10.3389/fmicb.2016.01339.

710  
711

## 712 **Figure Legends**

713

714 **Figure 1.** Last three steps of menaquinone biosynthesis in mycobacteria. (A) MenA adds  
715 a polyprenol such as nonaprenol to 1,4-dihydroxy-2-naphthoic acid forming DMK-9.  
716 MenG methylates the polar ring resulting in MK-9. MenJ reduces one C=C bond of the  
717 second prenyl group to form the mature MK-9 (II-H<sub>2</sub>). (B) Predicted transmembrane  
718 domains of the last menaquinone biosynthetic enzymes using TMHMM Server 2.0  
719 (Krogh et al., 2001) based on amino acid sequence. MenA (upper panel) has seven  
720 predicted transmembrane helices, while MenG and MenJ show no predicted  
721 transmembrane domains.

722

723 **Figure 2.** Subcellular localization of menaquinone biosynthesis. (A-C) Sucrose density  
724 gradient fractionation of cell lysates prepared from strains expressing (A) MenA-HA, (B)  
725 MenG-HA and (C) MenJ-HA. Protein concentration and sucrose density in each fraction  
726 were plotted in the graph. Protein markers for the IMD and the PM-CW were PimB' (41  
727 kDa) and MptA (54 kDa), respectively. All experiments were done more than twice and  
728 representative data are shown.

729

730 **Figure 3.** Co-localization of MenG with IMD associated protein GlfT2. (A) Sucrose  
731 density fractionation of strain expressing HA-mCherry-GlfT2 (100 kDa) and MenG-  
732 mTurquoise-HA (50 kDa). The epitope-tagged proteins were detected by anti-HA  
733 antibody. PimB' (41 kDa) and MptA (54 kDa), respectively, indicate the IMD and PM-  
734 CW fractions. (B) Fluorescence microscopy showing localization of both MenG-  
735 mTurquoise-HA and HA-mCherry-GlfT2 at the pole of growing *M. smegmatis* cells. (C)  
736 Autofluorescence of WT *M. smegmatis* on blue channel observed under the identical

737 image acquisition setting as in panel B. Scale bar = 5  $\mu\text{m}$ . All experiments were done  
738 more than twice and representative data are shown.

739

740 **Figure 4.** Proposed spatial compartmentalization of MK-9 biosynthetic pathway. DMK-9  
741 is formed in the PM-CW by the prenyltransferase MenA. DMK-9 traffics to the IMD and  
742 modified by MenG and MenJ, forming MK-9 and MK-9 (II-H<sub>2</sub>), respectively. The  
743 mature molecule can then be transferred to the PM-CW to serve as an electron carrier.  
744 The red line in the polyprenol moiety of MK-9 (II-H<sub>2</sub>) indicates the saturation of the  
745 second isoprene unit mediated by MenJ. SAM, S-adenosylmethionine.

746

747 **Figure 5.** MenG knockdown. (A) Scheme of MenG depletion. When the  $\Delta menG$   
748  $L5::tet_{off} menG-HA-DAS Str^f Tweety::tet_{on} sspB Kan^f$  strain is exposed to ATC, a  
749 tetracycline analog, MenG expression is shut off and the protein is tagged for degradation  
750 by SspB. (B) Growth curve of  $\Delta menG L5::tet_{off} menG-HA-DAS Str^f Tweety::tet_{on} sspB$   
751  $Kan^f$  exposed to ATC over 72 hours of subculturing every 24 hours. The averages of  
752 biological triplicates are shown with standard deviations. (C) MenG depletion after 48  
753 and 72 hours of ATC treatment detected by western blotting. Images were captured by  
754 the ImageQuant LAS4000mini image documentation system and bands were quantified  
755 using ImageQuant analysis software (GE Healthcare). ATC, anhydrotetracycline. All  
756 experiments were done more than twice and representative data are shown.

757

758 **Figure 6.** Changes in menaquinone species upon MenG depletion. Lipid extracts from  
759 crude cell lysates were analyzed by HPLC mass spectrometry to quantify (A) DMK-9,  
760 (B) MK-9 and (C) MK-9 (II-H<sub>2</sub>). In three independent experiments, lysates were  
761 prepared after 72-h growth with or without ATC (biological triplicates). From each  
762 replicate of the biological triplicates, lipids were extracted and analyzed twice (technical  
763 duplicates). MK-4 was added as an internal standard to control the efficiency of lipid  
764 extraction and HPLC mass spectrometry analysis. Each point in the graphs is the average  
765 of the technical duplicate, and the grey line represents the average of biological  
766 triplicates. The unit is pmol of indicated menaquinone species per  $\mu\text{l}$  of cell lysate. \*,  $p <$   
767 0.05 by t-test.

768

769

770 **Figure 7.** Effect of MenG depletion on aerobic respiration and intracellular ATP level.  
771 (A) Oxygen consumption by *M. smegmatis* MenG depletion strain after 72-h with and  
772 without treatment with ATC. The decolorization of methylene blue in the media was used  
773 as an indication of the oxygen consumption, taking the A<sub>665</sub> of methylene blue  
774 immediately after the addition of ATC (at 0 min) as 100%. (B) ATP accumulation over a  
775 24-hour period during the third sub-culturing from the 48-h to the 72-h time point with  
776 and without ATC. The averages of biological triplicates are shown with standard  
777 deviations. ATC, anhydrotetracycline.

778



Figure 1

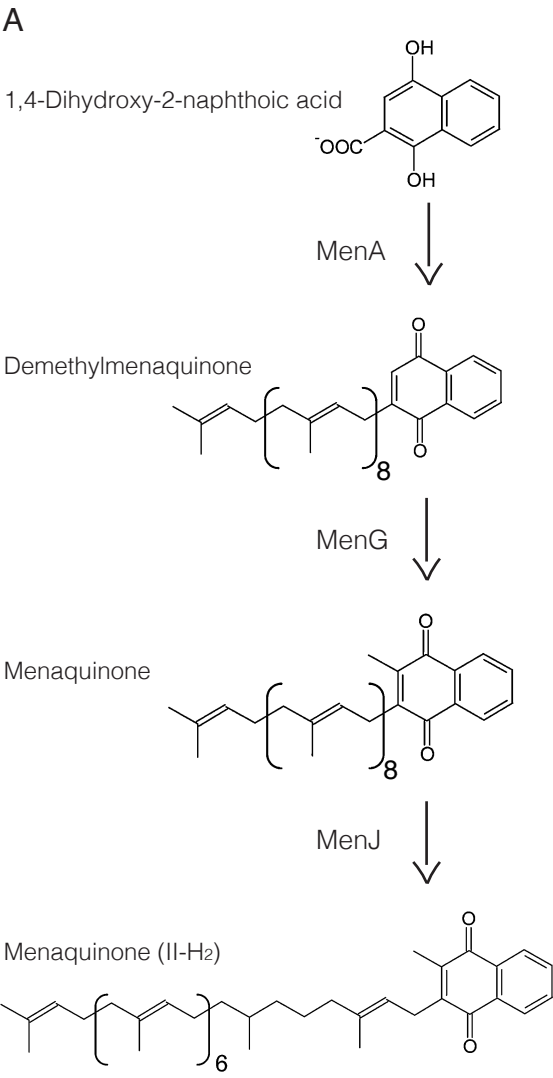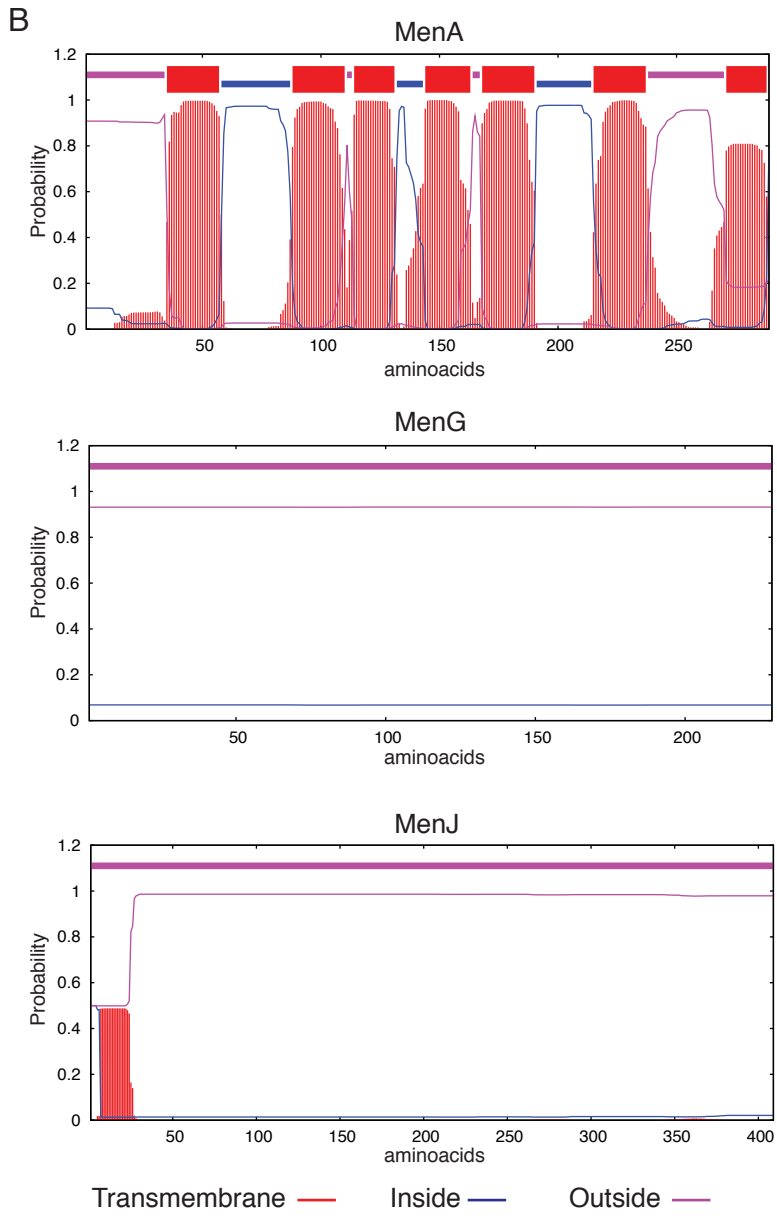

Figure 2

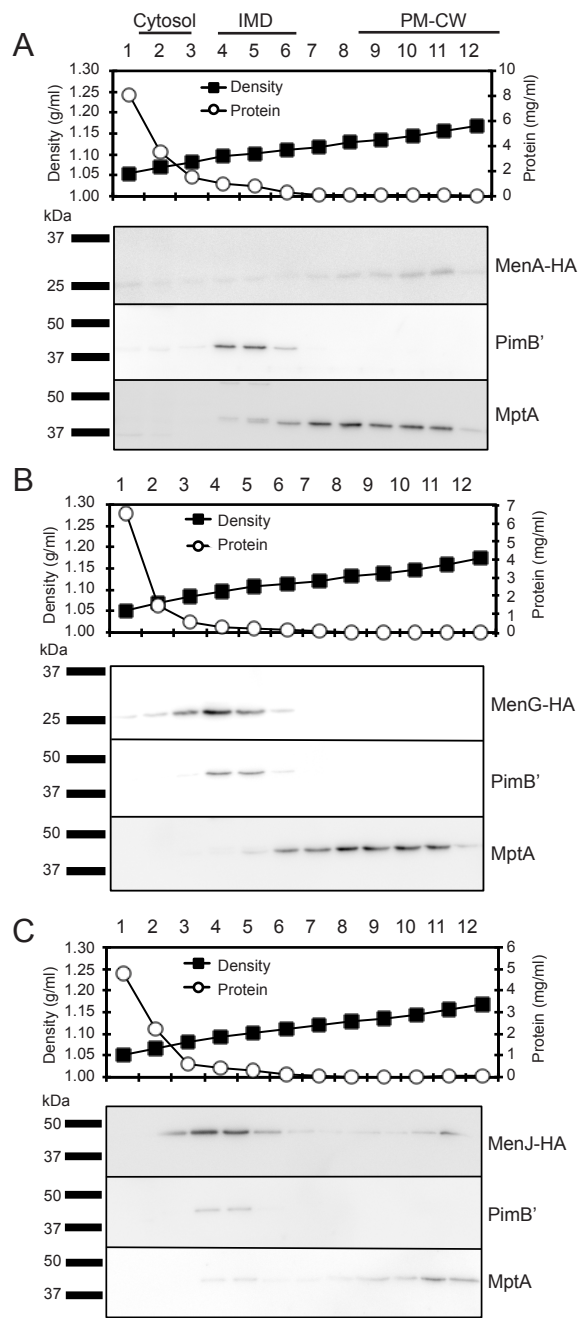

Figure 3

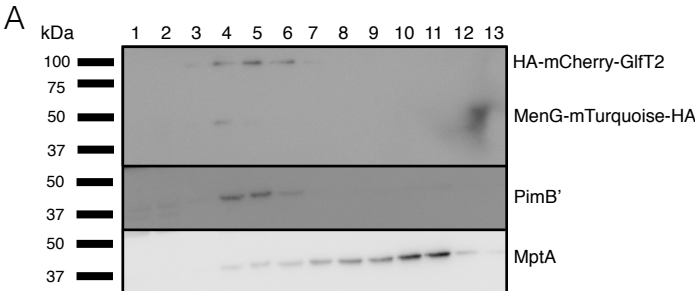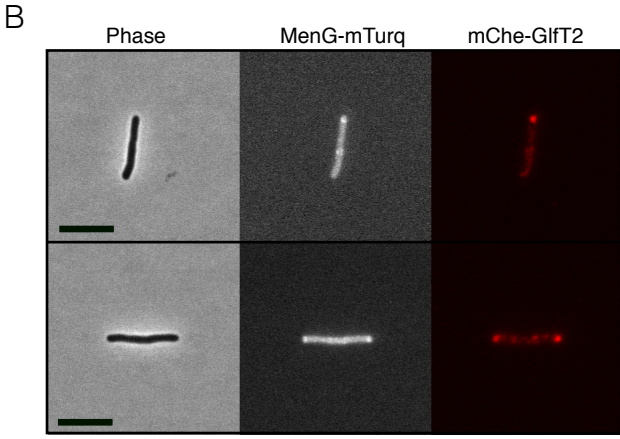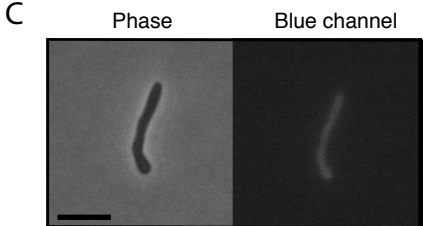

Figure 4

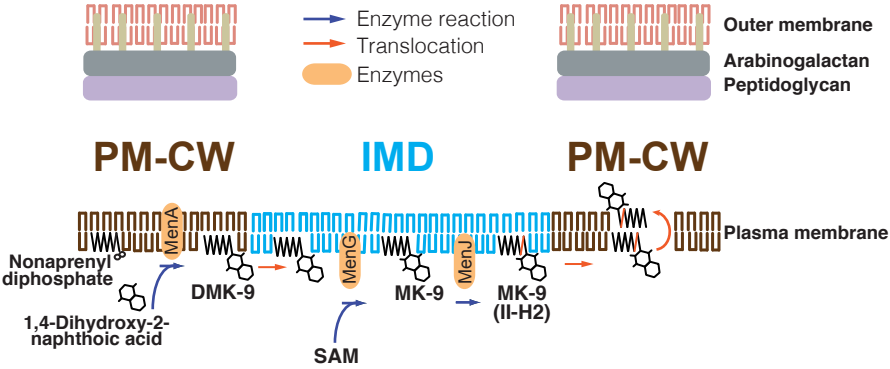

Figure 5

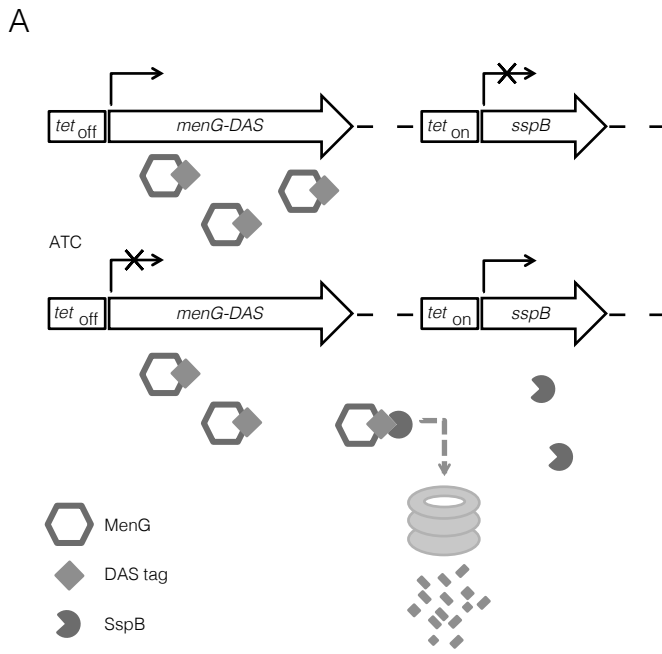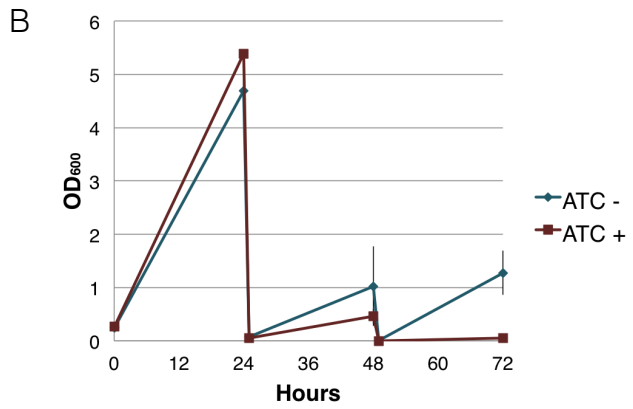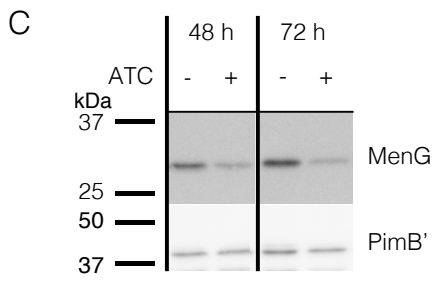

Figure 6

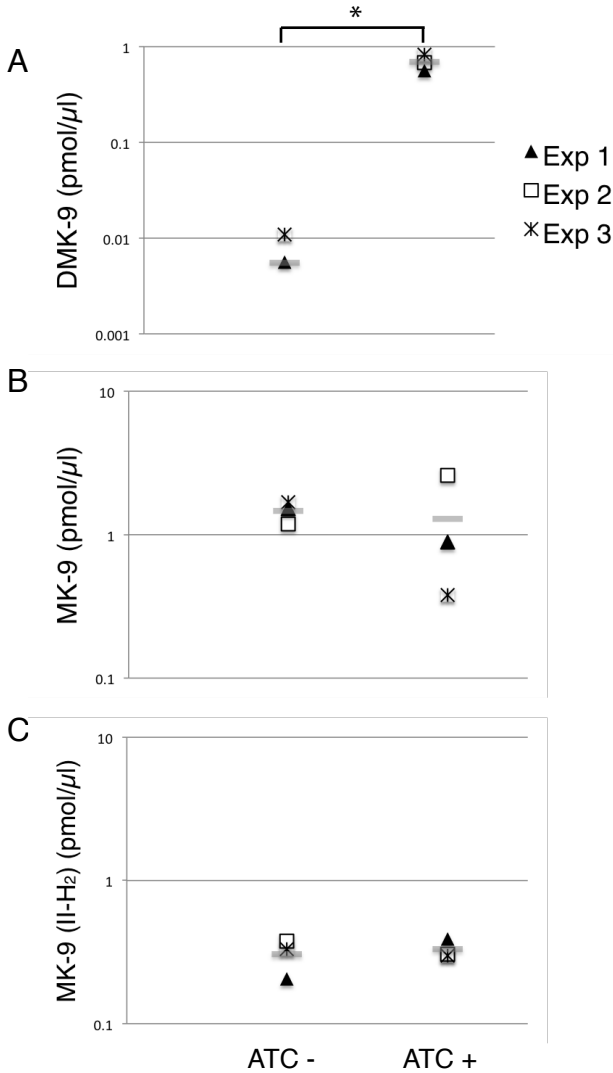

Figure 7

A

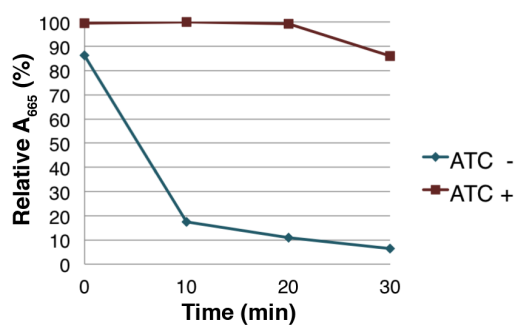

B

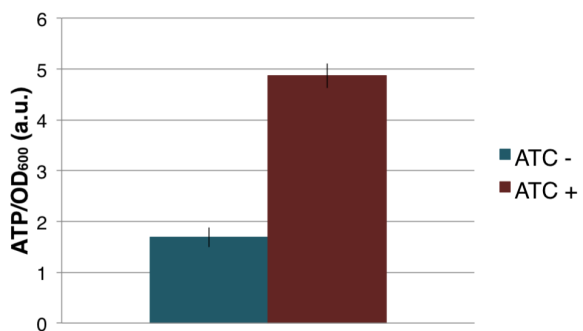

Source: https://www.biorxiv.org/content/10.1101/452839v1.full.pdf
